# Supplementary material for: PhiSpy: a novel algorithm for finding prophages in bacterial genomes that combines similarity- and composition-based strategies
Source: PubMed Central journal article supplement — Nucleic Acids Res. 2012 May 14;40(16):e126. doi: 10.1093/nar/gks406 (PMC3439882; doi:10.1093/nar/gks406), 2012-05-14
Supplement: supp_gks406_nar-03036-met-n-2011-File011.pdf [file supp_gks406_nar-03036-met-n-2011-File011.pdf]

## Supplemental Materials

### Figure Legends

Supplemental Figure 1: Flowchart of *phiSpy*.

Supplemental Figure 2: An example of how to calculate the parameter *transcriptional strand orientation*.

Supplemental Figure 3: Permutation distribution for four different test statistics. The blue line indicates the observed difference of the mean/median of the two distribution of skew. The permutation Achieved Significant Level ( $ASL_{perm}$ ) leads to rejection of the null hypothesis for all four statistics. (A) the distribution for customized AT skew and the observed differences of mean. (B) the distribution for customized AT skew and the observed differences of median. (C) the distribution for customized GC skew and the observed differences of mean. (D) the distribution for customized AT skew and the observed differences of median.

Supplemental Figure 4: Median protein length difference for bacteria (■) and phages (□). For bacteria, the difference is the median length of all proteins in the genome and the median of all bacterial proteins in the genome. For phages, the difference is the median length of all proteins in the genome and the median of all phage proteins in the genome. The median difference is higher for phage proteins than bacterial proteins.

Supplemental Figure 5: Flowchart of performance analysis.

**Supplemental Table 1:** List of 41 bacterial genomes, which have manually annotated prophages.

*Bacillus halodurans* C-125  
*Bacillus subtilis* subsp. *subtilis* str. 168  
*Bifidobacterium longum* NCC2705  
*Brucella melitensis* 16M  
*Caulobacter crescentus* CB15  
*Clostridium perfringens* str. 13  
*Clostridium tetani* E88  
*Deinococcus radiodurans* R1  
*Escherichia coli* CFT073  
*Escherichia coli* K12  
*Escherichia coli* O157:H7  
*Escherichia coli* O157:H7 EDL933  
*Haemophilus influenzae* Rd KW20  
*Lactococcus lactis* subsp. *lactis* Il1403  
*Listeria innocua* Clip11262  
*Listeria monocytogenes* EGD-e  
*Mesorhizobium loti* MAFF303099  
*Mycobacterium tuberculosis* CDC1551  
*Mycobacterium tuberculosis* H37Rv  
*Neisseria meningitidis* MC58  
*Neisseria meningitidis* Z2491  
*Pasteurella multocida* subsp. *multocida* str. Pm70  
*Pseudomonas aeruginosa* PAO1  
*Pseudomonas putida* KT2440  
*Ralstonia solanacearum* GMI1000  
*Salmonella enterica* subsp. *enterica* serovar *Typhi* str. CT18  
*Shewanella oneidensis* MR-1  
*Shigella flexneri* 2a str. 301  
*Staphylococcus aureus* subsp. *aureus* Mu50  
*Staphylococcus aureus* subsp. *aureus* MW2  
*Streptococcus agalactiae* 2603V/R  
*Streptococcus pyogenes* M1 GAS  
*Streptococcus pyogenes* MGAS315  
*Streptococcus pyogenes* MGAS8232  
*Streptomyces coelicolor* A3(2)  
*Vibrio cholerae* O1 biovar *eltor* str. N16961  
*Xanthomonas axonopodis* pv. *citri* str. 306  
*Xylella fastidiosa* 9a5c  
*Xylella fastidiosa* Temecula1  
*Yersinia pestis* CO92  
*Yersinia pestis* KIM

**Supplemental Table 2: Prophage prediction in 45 complete bacterial genomes, which has a closely related training organism**

| Training Organism                               | Organism                                                                    | Known Prophage | Probable Prophage | Undefined |
|-------------------------------------------------|-----------------------------------------------------------------------------|----------------|-------------------|-----------|
| <i>Brucella melitensis</i>                      | <i>Brucella suis</i> 1330                                                   | 0              | 0                 | 0         |
| <i>Caulobacter crescentus</i>                   | <i>Caulobacter</i> sp. K31                                                  | 1              | 0                 | 0         |
| <i>Escherichia coli</i> K12                     | <i>Escherichia coli</i> ATCC 8739                                           | 3              | 0                 | 0         |
| <i>Escherichia coli</i> K12                     | <i>Escherichia coli</i> CFT073                                              | 5              | 0                 | 0         |
| <i>Escherichia coli</i> K12                     | <i>Escherichia coli</i> E24377A                                             | 6              | 1                 | 0         |
| <i>Escherichia coli</i> K12                     | <i>Escherichia coli</i> O157:H7                                             | 16             | 0                 | 0         |
| <i>Escherichia coli</i> K12                     | <i>Escherichia coli</i> W3110                                               | 3              | 0                 | 0         |
| <i>Listeria innocua</i>                         | <i>Listeria monocytogenes</i> EGD-e                                         | 1              | 0                 | 0         |
| <i>Mycobacterium tuberculosis</i> H37Rv         | <i>Mycobacterium tuberculosis</i> CDC1551                                   | 2              | 0                 | 0         |
| <i>Mycobacterium tuberculosis</i> H37Rv         | <i>Mycobacterium tuberculosis</i> H37Ra                                     | 2              | 0                 | 0         |
| <i>Pseudomonas putida</i> KT2440                | <i>Pseudomonas putida</i> W619                                              | 3              | 0                 | 0         |
| <i>Pseudomonas putida</i> KT2440                | <i>Pseudomonas syringae</i> pv. phaseolicola 1448A                          | 3              | 0                 | 0         |
| <i>Pseudomonas putida</i> KT2440                | <i>Pseudomonas syringae</i> pv. tomato str. DC3000                          | 4              | 0                 | 0         |
| <i>Escherichia coli</i> K12                     | <i>Salmonella enterica</i> subsp. enterica serovar Choleraesuis str. SC-B67 | 4              | 1                 | 0         |
| <i>Escherichia coli</i> K12                     | <i>Salmonella enterica</i> subsp. enterica serovar Typhi str. CT18          | 11             | 0                 | 0         |
| <i>Escherichia coli</i> K12                     | <i>Salmonella typhimurium</i> LT2                                           | 6              | 0                 | 0         |
| <i>Shewanella oneidensis</i>                    | <i>Shewanella baltica</i> OS185                                             | 4              | 0                 | 0         |
| <i>Shewanella oneidensis</i>                    | <i>Shewanella baltica</i> OS195                                             | 3              | 0                 | 0         |
| <i>Shewanella oneidensis</i>                    | <i>Shewanella</i> sp. ANA-3                                                 | 0              | 0                 | 0         |
| <i>Escherichia coli</i> K12                     | <i>Shigella flexneri</i> 2a str. 2457T                                      | 20             | 0                 | 0         |
| <i>Escherichia coli</i> K12                     | <i>Shigella flexneri</i> 2a str. 301                                        | 8              | 0                 | 0         |
| <i>Staphylococcus aureus</i> subsp. aureus Mu50 | <i>Staphylococcus aureus</i> RF122                                          | 2              | 0                 | 0         |
| <i>Staphylococcus aureus</i> subsp. aureus Mu50 | <i>Staphylococcus aureus</i> subsp. aureus COL                              | 1              | 0                 | 0         |
| <i>Staphylococcus aureus</i> subsp. aureus Mu50 | <i>Staphylococcus aureus</i> subsp. aureus MRSA252                          | 3              | 0                 | 0         |
| <i>Staphylococcus aureus</i> subsp. aureus MW2  | <i>Staphylococcus aureus</i> subsp. aureus Mu50                             | 3              | 0                 | 0         |
| <i>Staphylococcus aureus</i> subsp. aureus Mu50 | <i>Staphylococcus aureus</i> subsp. aureus NCTC 8325                        | 3              | 0                 | 0         |
| <i>Staphylococcus aureus</i> subsp. aureus Mu50 | <i>Staphylococcus aureus</i> subsp. aureus USA300                           | 2              | 0                 | 0         |
| <i>Staphylococcus aureus</i> subsp. aureus Mu50 | <i>Staphylococcus epidermidis</i> ATCC 12228                                | 0              | 0                 | 0         |
| <i>Staphylococcus aureus</i> subsp. aureus Mu50 | <i>Staphylococcus haemolyticus</i> JCSC1435                                 | 2              | 0                 | 0         |
| <i>Staphylococcus aureus</i> subsp. aureus Mu50 | <i>Staphylococcus saprophyticus</i> subsp. saprophyticus ATCC 15305         | 0              | 0                 | 0         |
| <i>Xanthomonas axonopodis</i>                   | <i>Stenotrophomonas maltophilia</i> K279a                                   | 3              | 0                 | 0         |
| <i>Streptococcus agalactiae</i> 2603V/R         | <i>Streptococcus agalactiae</i> NEM316                                      | 0              | 0                 | 3         |
| <i>Streptococcus pyogenes</i> MGAS8232          | <i>Streptococcus pyogenes</i> MGAS10394                                     | 6              | 1                 | 0         |
| <i>Streptococcus pyogenes</i> MGAS8232          | <i>Streptococcus uberis</i> 0140J                                           | 0              | 1                 | 0         |
| <i>Streptomyces coelicolor</i>                  | <i>Streptomyces avermitilis</i> MA-4680                                     | 1              | 0                 | 0         |
| <i>Xanthomonas axonopodis</i>                   | <i>Xanthomonas campestris</i> pv. <i>campestris</i> ATCC 33913              | 1              | 1                 | 0         |
| <i>Xanthomonas axonopodis</i>                   | <i>Xanthomonas campestris</i> pv. <i>campestris</i> str. 8004               | 0              | 2                 | 0         |
| <i>Xanthomonas axonopodis</i>                   | <i>Xanthomonas campestris</i> pv. <i>vesicatoria</i> str. 85-10             | 1              | 0                 | 0         |
| <i>Xylella fastidiosa</i> 2a str. 301           | <i>Xylella fastidiosa</i> M12                                               | 3              | 0                 | 0         |
| <i>Xylella fastidiosa</i> 2a str. 301           | <i>Xylella fastidiosa</i> Temecula1                                         | 7              | 0                 | 0         |
| <i>Yersinia pestis</i> CO92                     | <i>Yersinia enterocolitica</i> 8081                                         | 3              | 1                 | 0         |
| <i>Yersinia pestis</i> CO92                     | <i>Yersinia pestis</i> biovar Medievalis str. 91001                         | 5              | 0                 | 0         |
| <i>Yersinia pestis</i> CO92                     | <i>Yersinia pestis</i> KIM                                                  | 4              | 0                 | 0         |
| <i>Yersinia pestis</i> CO92                     | <i>Yersinia pseudotuberculosis</i> IP 32953                                 | 5              | 1                 | 0         |
| <i>Yersinia pestis</i> CO92                     | <i>Yersinia pseudotuberculosis</i> YPIII                                    | 6              | 1                 | 0         |
|                                                 | <b>Total</b>                                                                | <b>166</b>     | <b>10</b>         | <b>3</b>  |

## Supplemental Figures:

### Supplemental Figure 1

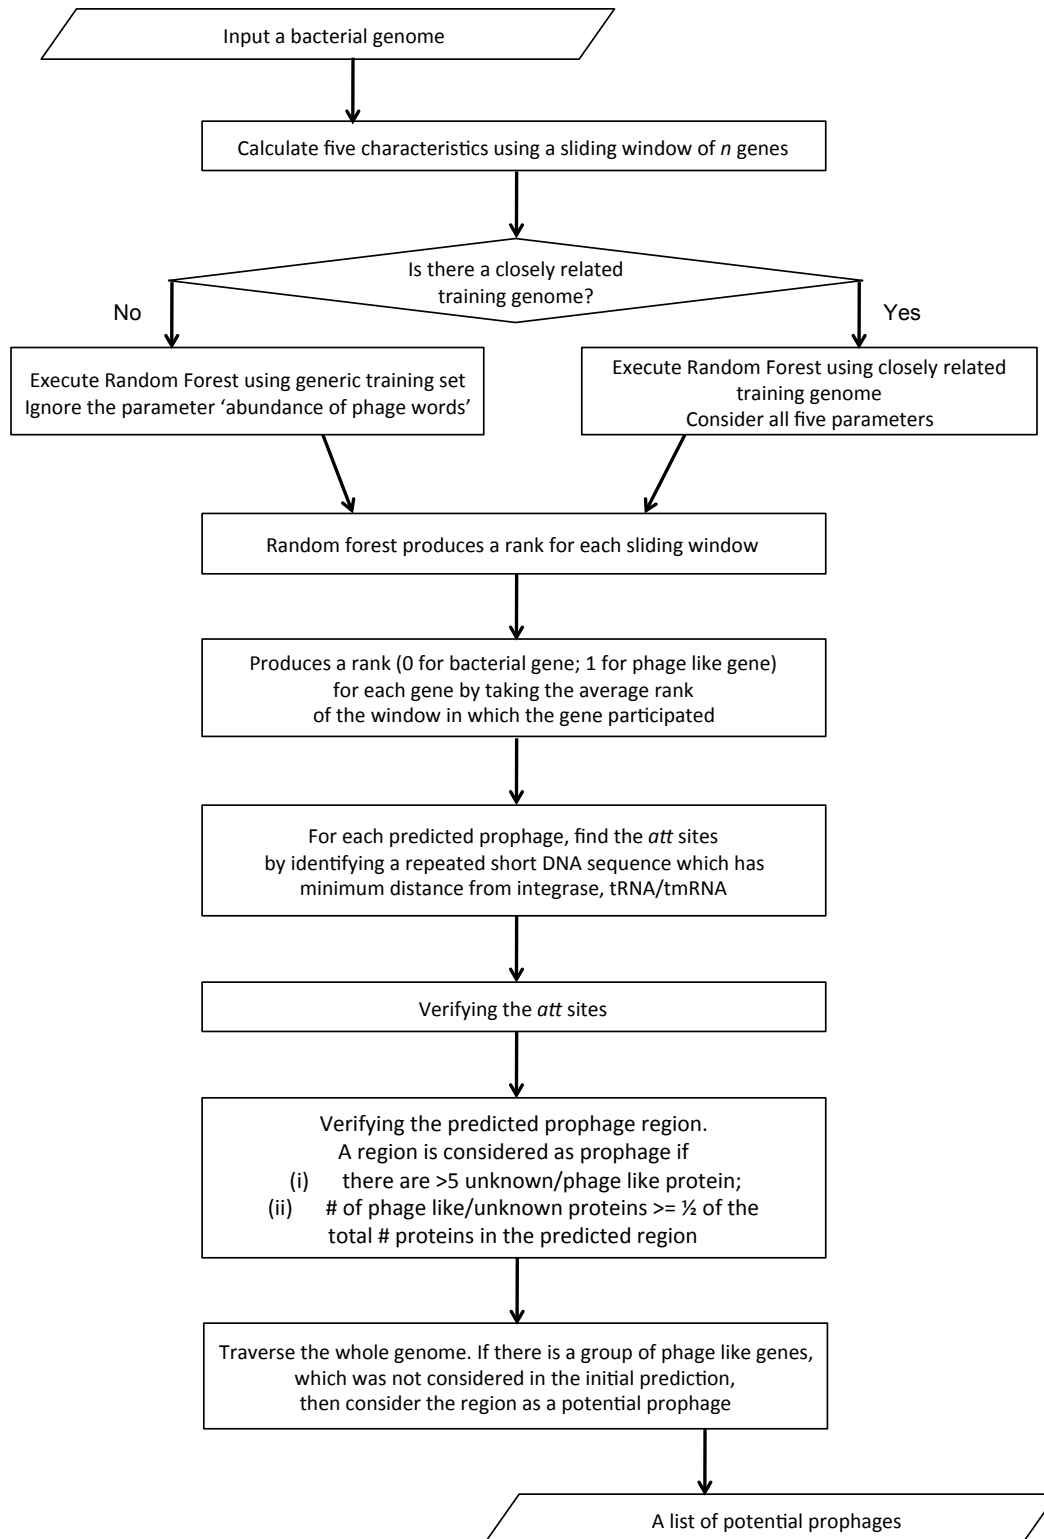

Supplemental Figure 2

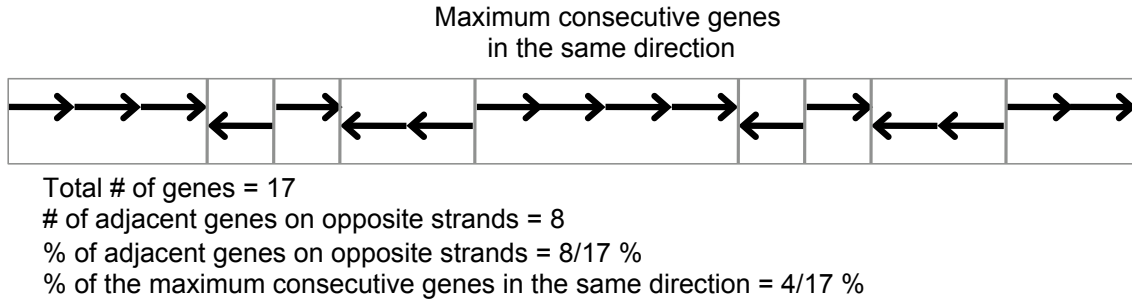

Supplemental Figure 3

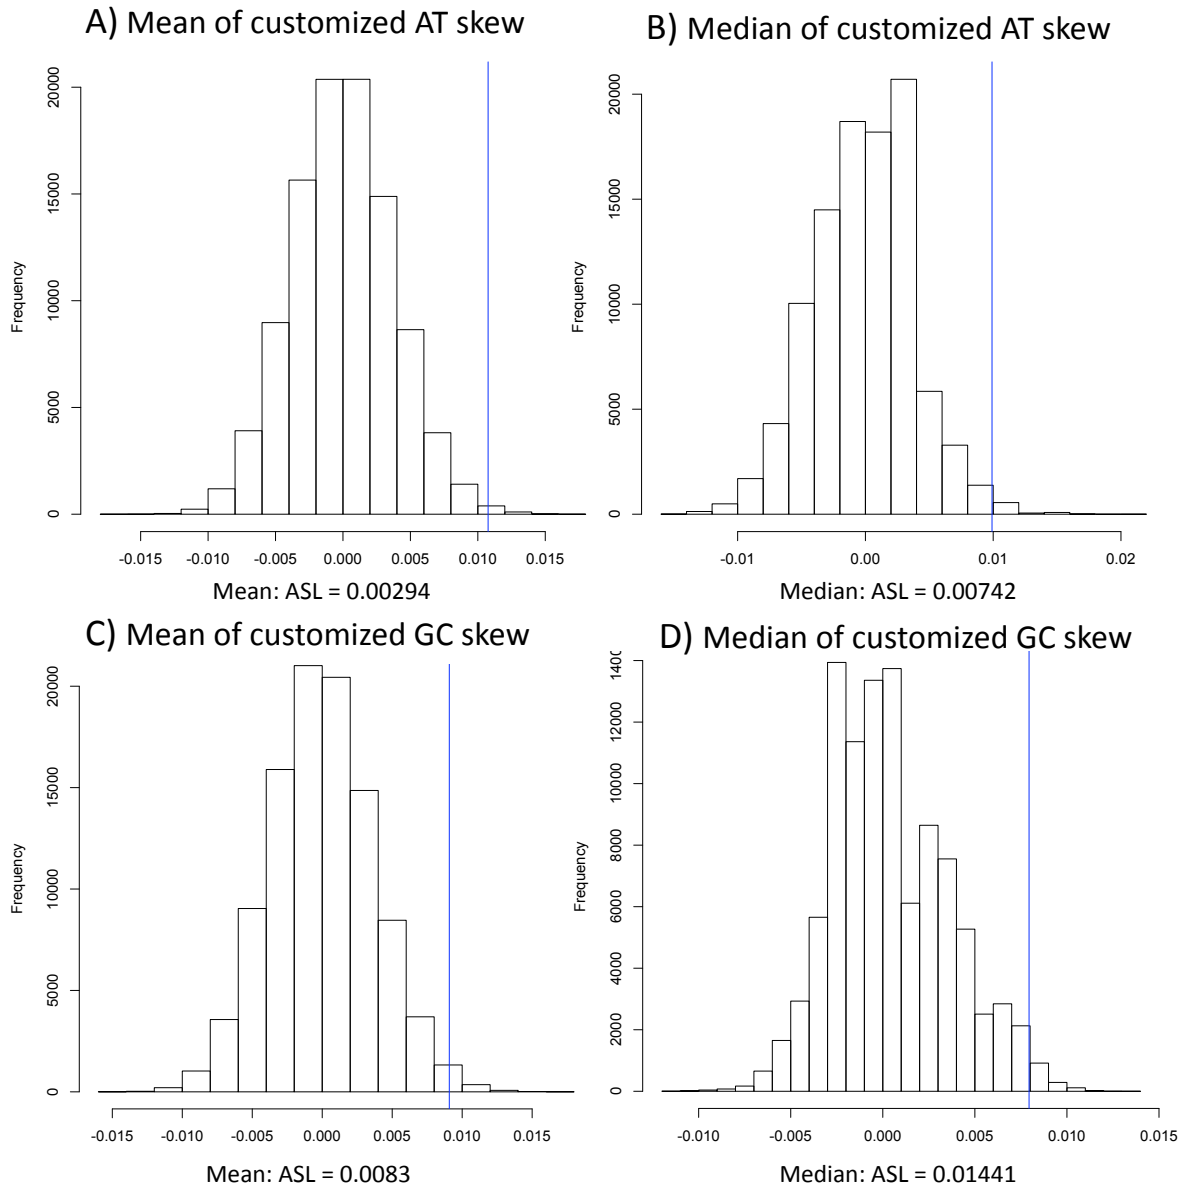

Supplemental Figure 4

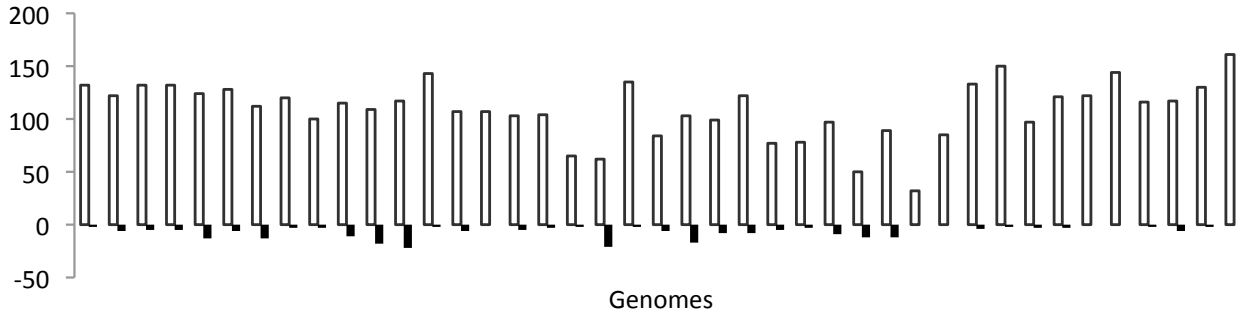

Supplemental Figure 5

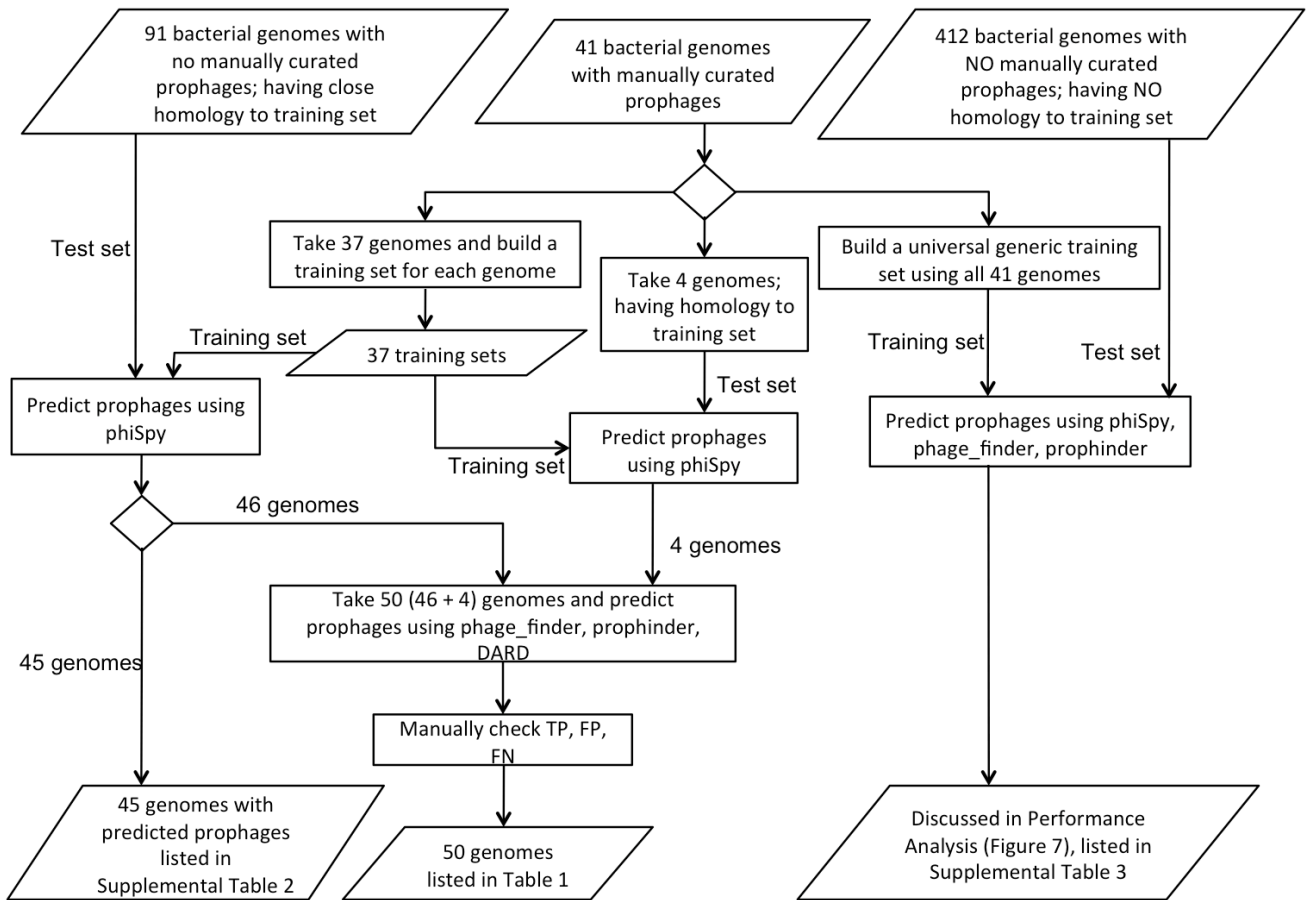

### **Permutation test for customized AT/GC skew:**

For permutation test, two samples (F and G) were created. To create sample F, 190 prophages in 41 complete bacterial genomes were considered. Sample F consists of the absolute difference between the customized AT/GC skew of prophage genes and the customized AT/GC skew of prophages' flanking genes (same length of corresponding prophage). The size of sample F is 190.

To make the sample G, 800 different bacterial regions were randomly selected from 41 bacterial genomes. The absolute differences of the customized AT/GC skew of these regions and the customized AT/GC skew of the flanking genes of these regions was calculated for sample G. The sample size of G is 800.

Null hypothesis,  $H_0: F = G$

To test the null hypothesis we did the permutation test using both the difference of mean (mean of F – mean of G) and the difference of median (median of F – median of G). The test was done as follows:

1. The difference in means/medians between the two samples was calculated, which was the observed value of the test statistic.
2. Sample F and G were combined and randomly divided them into two groups (A and B) of size 190 and 800.
3. The difference in means/medians of group A and B was calculated and recorded.
4. Step 2 and 3 were repeated for 100,000 times.

#### Customized AT skew (mean)

Sampled permutation size,  $s = 100,000$

Mean of Sample F = 0.06627

Mean of Sample G = 0.0555

The difference in mean between sample F and G, (say T) = 0.01076

The sampled permutation values where the difference in means is greater than T = 294

P value =  $294/100000 = 0.00294 < 0.01$

So we can reject the null hypothesis.

#### Customized AT skew (median)

Sampled permutation size,  $s = 100,000$

Median of Sample F = 0.0539

Median of Sample G = 0.04408

The difference in median between sample F and G, (say T) = 0.0099

The sampled permutation values where the difference in medians is greater than T = 742

P value =  $742/100000 = 0.00742 < 0.01$

So we can reject the null hypothesis.

#### Customized GC skew (mean)

Sampled permutation size,  $s = 100,000$

Mean of Sample F = 0.05445

Mean of Sample G = 0.04537

The difference in mean between sample F and G, (say T) = 0.00908

The sampled permutation values where the difference in means is greater than T = 830

P value = 830/100000 = 0.00830 < 0.01

So we can reject the null hypothesis.

#### Customized GC skew (median)

Sampled permutation size, s = 100,000

Median of Sample F = 0.04099

Median of Sample G = 0.03304

The difference in median between sample F and G, (say T) = 0.00794

The sampled permutation values where the difference in medians is greater than T = 1441

P value = 1441/100000 = 0.01441 < 0.05

So we can reject the null hypothesis.

### **T-test for the slope of the model of Shannon's index and the frequency of phage words:**

There are two samples: bacteria and phages.

The sample size of bacteria, m = 401

The linear model of bacterial sample:  $F = 5.85 H + 0.014$  ... (1)

The sample size of phages, n = 600

The linear model of phage sample:  $F = 8.57 H + 0.047$  ... (2)

We want to test whether the slope of these two equations are significantly different or not.

$H_0: \beta_b = \beta_p$

$H_A: \beta_b \neq \beta_p$

where,  $\beta_b$  is the slope of bacterial sample and  $\beta_p$  is the slope of phage sample.

T test for two independent unequal sample sizes:

$$t = \frac{\bar{\beta}_p - \bar{\beta}_b}{\sqrt{SE(\beta_p)^2 + SE(\beta_b)^2}} \text{ where, SE is the standard error.}$$
$$t = \frac{8.9288 - 5.708284}{\sqrt{0.0224^2 + 0.02371^2}} = 9.87$$

Degree of freedom = m-2 + n -2 = 997

In t table, for degree of freedom 1000 and p = 0.001, the value is 3.3. Our  $t = 9.87 > 3.3$ .

So we can reject the null hypothesis.

That means the slope of the bacterial and phage samples are different.
